# Supplementary material for: Two Separate Cases: Complex Chromosomal Abnormality Involving Three Chromosomes and Small Supernumerary Marker Chromosome in Patients with Impaired Reproductive Function
Source: Genes (Basel). 2020 Dec 17;11(12):1511. doi: 10.3390/genes11121511 (PMC7766715; doi:10.3390/genes11121511)
Supplement: Supplementary file 1 [file genes-11-01511-s001.pdf]

# FISH analysis of a complex chromosomal rearrangement involving three chromosomes and small supernumerary marker chromosome in patients with impaired reproductive function

## Method of analysis

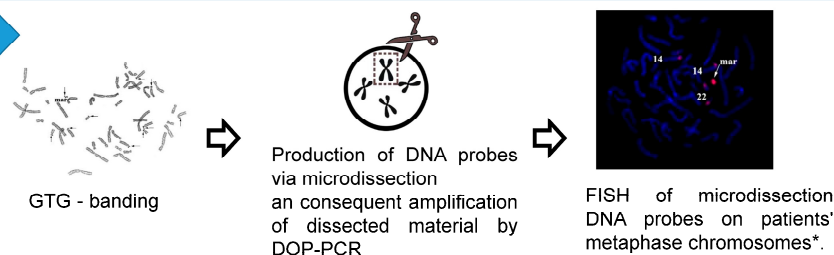

**\*Note.** If a DNA probe is derived from an abnormal chromosome, the FISH is performed on metaphase chromosomes of both the patient and a healthy volunteer. FISH with a loci specific DNA probes have been used to identify regions in rearranged chromosomes.

## Described cases

| Initial description of the patient's karyotype | Results of FISH analysis                                                                                          |
|------------------------------------------------|-------------------------------------------------------------------------------------------------------------------|
| 47,XY,+mar                                     | 47, XY, + del(14)(p13q11.1)                                                                                       |
| 46,XX,t(3;16;5)(q25;q21;p15.1)                 | 46,XX,der(3)(3pter→3q25::5p15.1→5pter),der(5)(16qter→16q21::3q25::5p15.1→5qter),der(16)(16pter→16q21::3q25→3qter) |

**Figure S1.** FISH analysis of a complex chromosomal rearrangement involving three chromosomes and small supernumerary marker chromosome in patients with impaired reproductive function.
